# Supplementary material for: Intensification effect of peroxide hydrogen on the complete dissolution of lignocellulose under mild conditions
Source: Royal Society of Chemistry journal article supplement (doi:10.1039/c6ra06687a), 2016-01-01
Supplement: c6ra06687a1.pdf [file c6ra06687a1.pdf]

## Supporting Information

### **Intensification effect of peroxide hydrogen on the complete dissolution of lignocellulose under mild condition**

Zhengqiu Yuan<sup>a,b</sup>, Jinxing Long<sup>a</sup>, Xinghua Zhang<sup>a</sup>, Tiejun Wang<sup>a,\*</sup>, Riyang Shu<sup>a,b</sup>  
Longlong Ma<sup>a</sup>

<sup>a</sup>*Key Laboratory of Renewable Energy, Guangzhou Institute of Energy Conversion,  
Chinese Academy of Science, Guangzhou 510640, PR China*

<sup>b</sup>*University of Chinese Academy of Science, Beijing 100049, PR China*

---

\* Corresponding author. Tel.: +86 20 87057673; fax: +86 20 87057789.

*E-mail:* [wangtj@ms.giec.ac.cn](mailto:wangtj@ms.giec.ac.cn) (T. Wang)

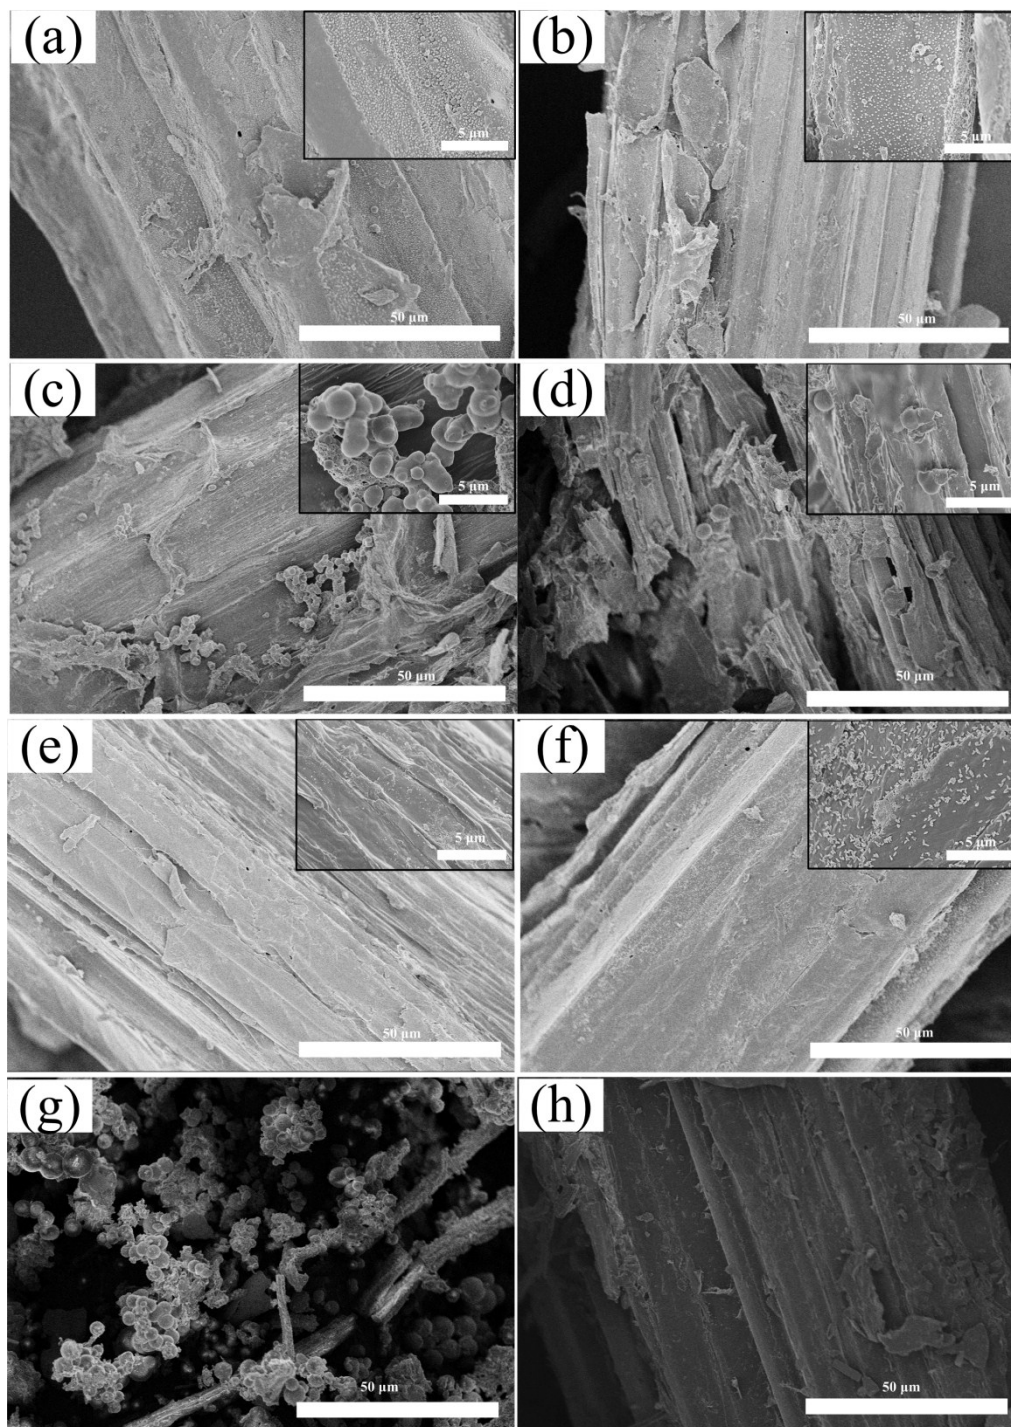

**Fig S1** SEM morphologies of raw and residues obtained from different treatments  
 Corn straw treated by different solutions (a): water (b):  $MSW_{PH}$  (c):  $MSW_{SA}$  (d):  $MSW_{SA+PH}$   
 (e): 75.0%  $C_2H_5OH$ +25.0%  $H_2O$  (f):  $MSEW_{PH}$  (g):  $MSEW_{SA}$  (h): Raw corn straw  
 Condition: corn straw 2.0 g;  $MSEW_{SA+PH}$  60 g; 170 °C; 120 min.

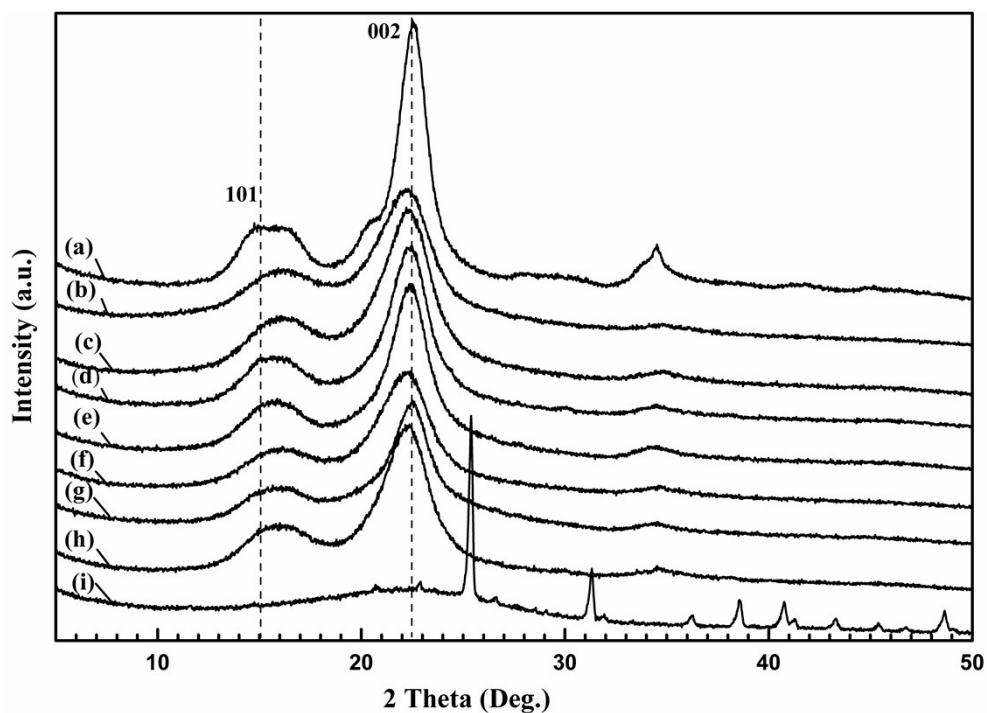

**Fig S2** XRD of raw and treated corn straw from different treatment.

Corn straw dissolved in different solutions. (a) Microcrystalline cellulose (b): Raw corn straw; (c): water; (d):  $MSW_{PH}$ ; (e):  $MSW_{SA}$ ; (f):  $MSW_{SA+PH}$ ; (g): 75.0%  $C_2H_5OH+25.0\% H_2O$ ; (h):  $MSEW_{PH}$ ; (i):  $MSEW_{SA}$ ;

Condition: corn straw 2.0 g; mixture solution 60 g; 170 °C; 120 min.

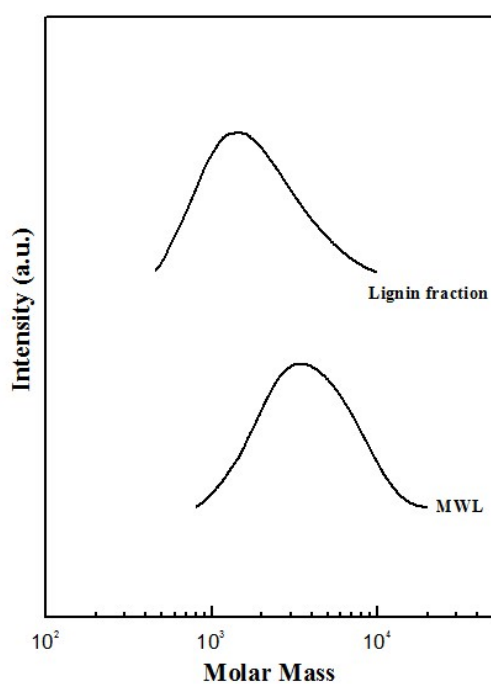

**Fig S3** Molecular weight distribution curves of the MWL and lignin fraction

Conditions: corn straw 2.0 g; MSEW<sub>SA+PH</sub> 60 g; 170 °C; 120 min.

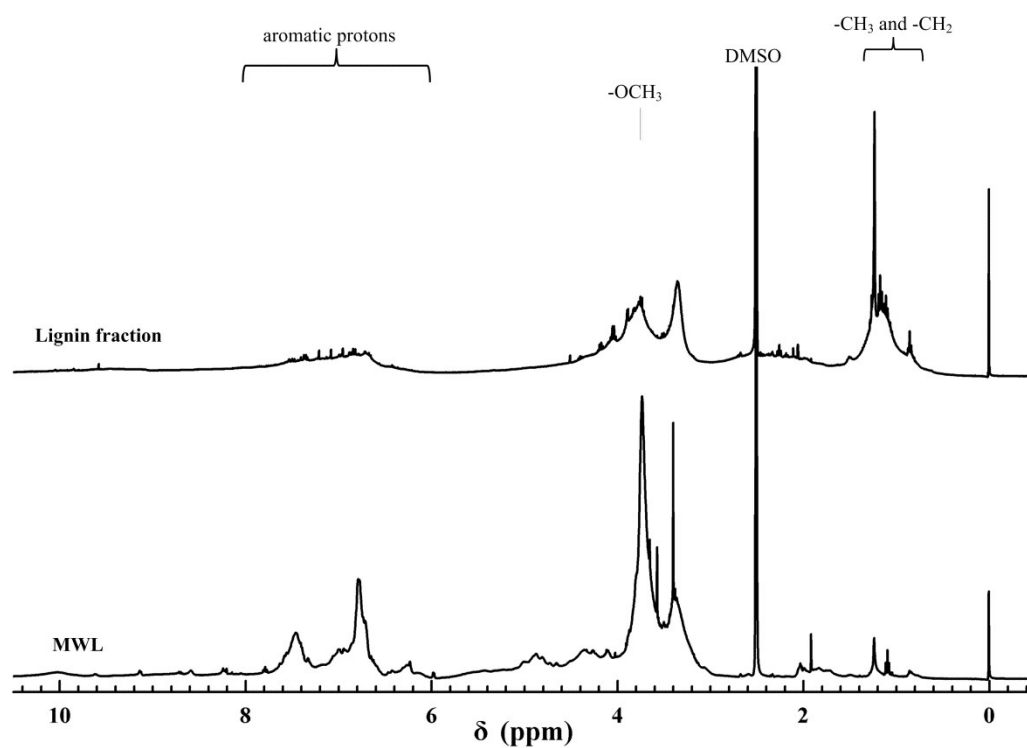

**Fig S4** <sup>1</sup>H NMR spectra of MWL and lignin fraction.

Conditions: corn straw 2.0 g; MSEW<sub>SA+PH</sub> 60 g; 170 °C; 120 min.

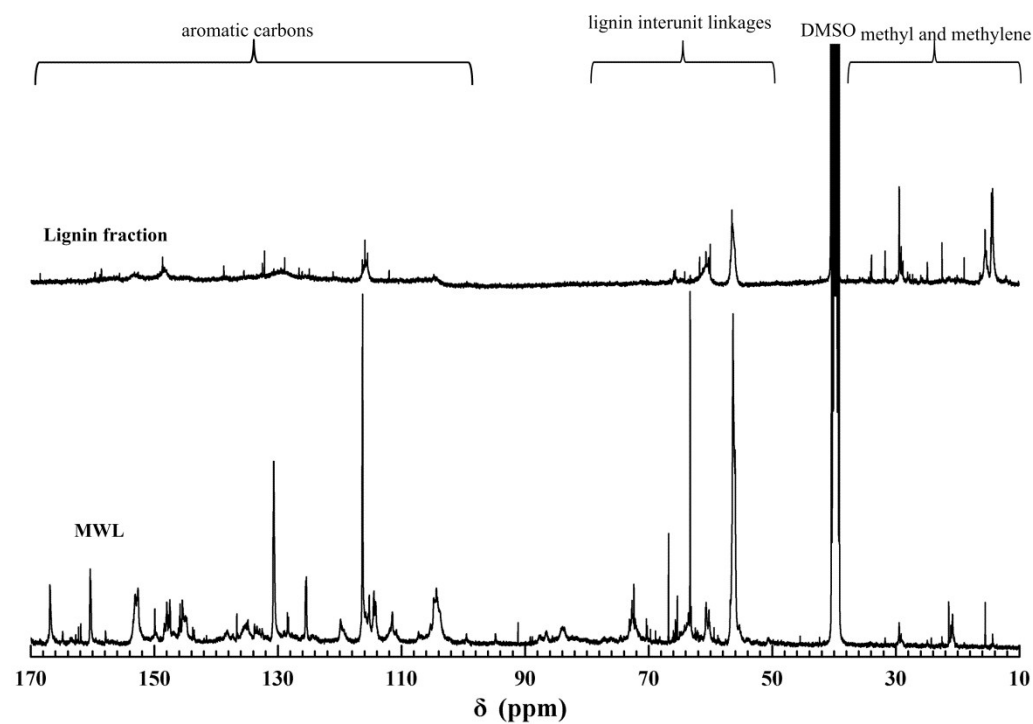

**Fig S5** <sup>13</sup>C NMR spectra of MWL and lignin fraction.

Conditions: corn straw 2.0 g; MSEW<sub>SA+PH</sub> 60 g; 170 °C; 120 min.

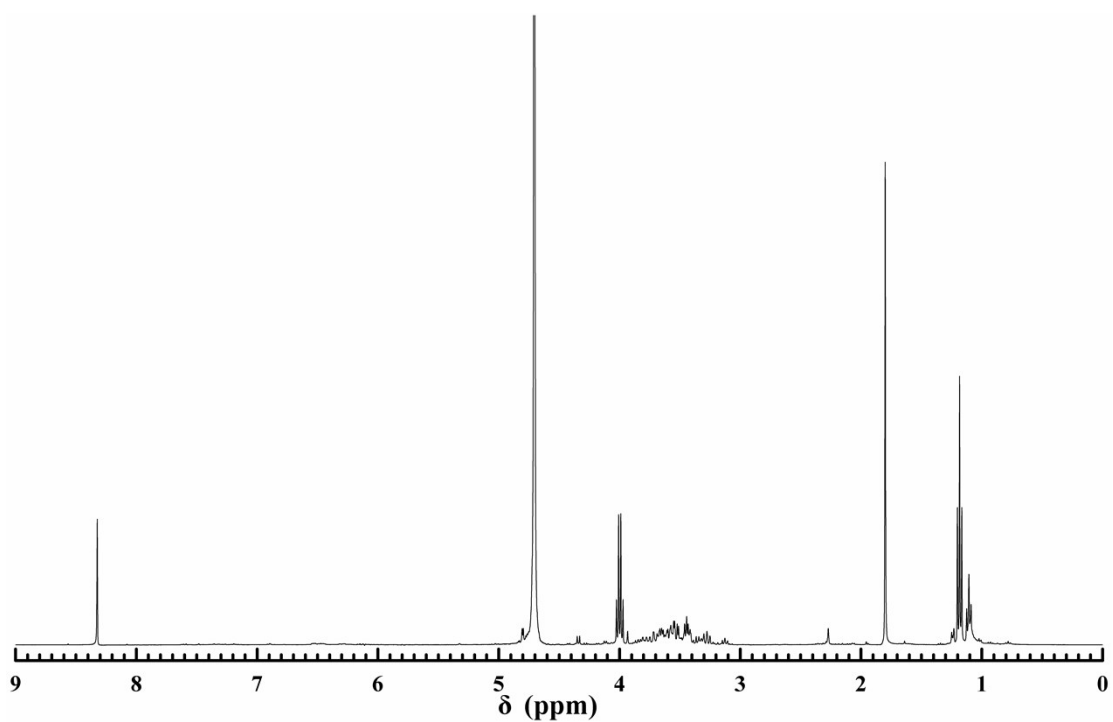

**Fig S6** <sup>1</sup>H NMR spectra of water-soluble part.

Conditions: corn straw 2.0 g; MSEW<sub>SA+PH</sub> 60 g; 170 °C; 120 min.

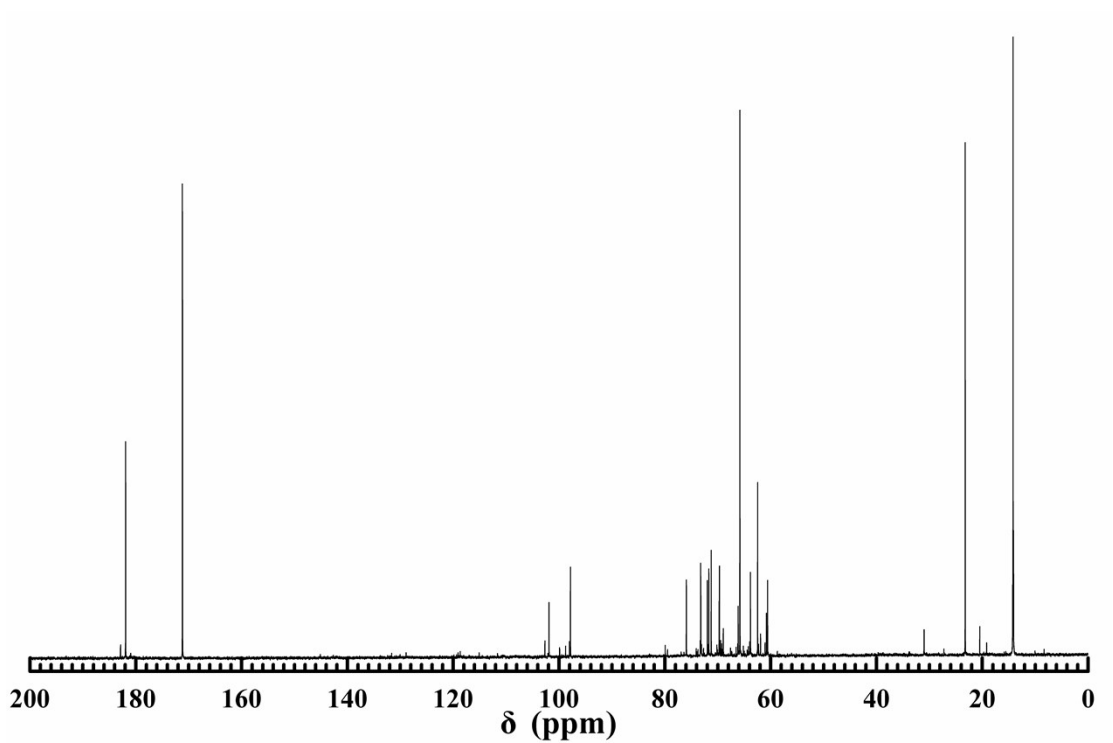

**Fig S7** <sup>13</sup>C NMR spectra of water-soluble part.

Conditions: corn straw 2.0 g; MSEW<sub>SA+PH</sub> 60 g; 170 °C; 120 min.

**Table S1** HPLC analysis of the liquids treated at different mixture solutions

| Entry | Mixture solvents                          |                                         |                                        |                           | Sugars                          |                                |                                   | Volatile chemical productions |                               |                            |
|-------|-------------------------------------------|-----------------------------------------|----------------------------------------|---------------------------|---------------------------------|--------------------------------|-----------------------------------|-------------------------------|-------------------------------|----------------------------|
|       | C <sub>2</sub> H <sub>5</sub> OH<br>(wt%) | H <sub>2</sub> SO <sub>4</sub><br>(wt%) | H <sub>2</sub> O <sub>2</sub><br>(wt%) | H <sub>2</sub> O<br>(wt%) | Glucose<br>(g L <sup>-1</sup> ) | Xylose<br>(g L <sup>-1</sup> ) | Arabinose<br>(g L <sup>-1</sup> ) | LA<br>(g L <sup>-1</sup> )    | 5-HMF<br>(g L <sup>-1</sup> ) | FF<br>(g L <sup>-1</sup> ) |
| 1     | 0                                         | 0                                       | 0                                      | 100                       | 0.292                           | 0.424                          | 0.144                             | -                             | -                             | -                          |
| 2     | 0                                         | 0                                       | 1.5                                    | 98.5                      | 0.199                           | 2.538                          | 0.282                             | 0.029                         | -                             | 0.114                      |
| 3     | 0                                         | 2.0                                     | 0                                      | 98.0                      | 2.375                           | 4.731                          | 0.788                             | 0.284                         | 0.076                         | 1.853                      |
| 4     | 0                                         | 2.0                                     | 1.5                                    | 96.5                      | 5.391                           | 1.394                          | 0.163                             | 0.565                         | 0.122                         | 0.958                      |
| 5     | 75.0                                      | 0                                       | 0                                      | 25.0                      | 0.196                           | 0.154                          | -                                 | 0.157                         | -                             | -                          |
| 6     | 75.0                                      | 0                                       | 1.5                                    | 23.5                      | 0.174                           | 0.172                          | 0.083                             | -                             | -                             | -                          |
| 7     | 75.0                                      | 2.0                                     | 0                                      | 23.0                      | 0.032                           | 0.225                          | -                                 | 1.855                         | -                             | 1.095                      |
| 8     | 75.0                                      | 2.0                                     | 1.5                                    | 21.5                      | 1.753                           | 2.042                          | 1.422                             | 0.593                         | 0.164                         | 2.586                      |

Condition: corn stalk 2.0 g; Liquid 60 g; 170 °C; 120 min.
